# Supplementary material
Source: PubMed Central journal article supplement (PMC167167)
Supplement: plntcell_15_8_1749__1.pdf [file plntcell_15_8_1749__1.pdf]

### Supplementary Material Table 1. AtbHLH proteins predicted to have DNA-binding capacity.

#### a. Putative E-box binders

Amino acid sequences of the bHLH domains of the proteins predicted to have E-box DNA binding capacity, based on the conservation of residues in positions E13 and R16 (highlighted in bold). Entry Number 139 lacks R16, but has a basic residue in this position and was kept in this category (See Functional Categories Section). Proteins are listed according to the Entry Number assigned and their AtbHLH Number and PID Number are also provided. Positions within the bHLH domain are numbered at the top of the figure, below the schematic that indicates the basic, helix and loop regions of the domain.

| EN | AtbHLH Number | PID Number | BASIC      |                    | HELIX      |            |             | LOOP       |   | HELIX |   |
|----|---------------|------------|------------|--------------------|------------|------------|-------------|------------|---|-------|---|
|    |               |            | 10         | E R 2              | 0          | 3          | 0           | 4          | 0 | 5     | 0 |
| 1  | 55            | AAF79643   | EPKNKRAKHK | <b>ELERQRRQEN</b>  | TSLFKILRYL | LPSQYIKGKR | SSADHVLEAV  | NYIKDLQKKI | K |       |   |
| 2  | 125           | AAF75809   | DRESKMKKHR | <b>DIERQRRQEV</b>  | SSLFKRLRTL | LPFQYIQGKR | STSDHIVQAV  | NYIKDLQIKI | K |       |   |
| 3  | 126           | NM118673   | NKKKKKLLHR | <b>DIERQRRQEM</b>  | ATLFATLRTH | LPLKYIKGKR | AVSDHVNQAV  | NFIKDTQTRK | T |       |   |
| 4  | 120           | NP199992   | TKKEKKLLHR | <b>NIERQRRQEM</b>  | AILFASLRSQ | LPLKYIKGKR | AMSDHVNQAV  | SFIKDTQTRI | K |       |   |
| 5  | 118           | NM118672   | ...MEKLVHK | <b>EIEKRRRQEM</b>  | ASLYASLRSL | LPLEFIQGKR | STSDQVKGAV  | NYIDYLQRNI | K |       |   |
| 6  | 36            | NM124557   | ...MEKMMHR | <b>ETERQRRQEM</b>  | ASLYASLRSL | LPLHFIKGKR | STSDQVNEAV  | NYIKYLQRKI | K |       |   |
| 7  | 100           | AAC78547   | PVVMKKLNHN | <b>ASERERRKKI</b>  | NTMFSLLRSC | LPPNTQTKKL | SVSATVSQL   | KYIPELQEQV | K |       |   |
| 8  | 38            | CAB72167   | PVVVKKLNHN | <b>ASERDRRKKI</b>  | NTLFSLLRSC | LPASDQSKKL | SIPETVSKSL  | KYIPELQEQV | K |       |   |
| 9  | 39            | CAB72168   | PVVVKKLNHN | <b>ASERDRRKKI</b>  | NSLFSLLRSC | LPASGQSKKL | SIPATVSRSL  | KYIPELQEQV | K |       |   |
| 10 | 101           | NM120497   | VVLEKKNLHN | <b>ASERDRRKKI</b>  | NALYSSLRAL | LPLSDQKRL  | SIPMTVARVV  | KYIPEQKQEL | Q |       |   |
| 11 | 67            | CAB71902   | EIENQRMTHI | <b>AVERNRRRQEM</b> | NEHINSLRAL | LPPSYIQ.RG | DQASIVGGAI  | NYVKVLEQII | Q |       |   |
| 12 | 57            | CAB77716   | EVENQRMTHI | <b>AVERNRRRQEM</b> | NEHLNSLRSL | MPPSFLQ.RG | DQASIVGGAI  | DFIKELEQLL | Q |       |   |
| 13 | 70            | AAC33499   | EIESQRMTHI | <b>AVERNRRRQEM</b> | NVHLNSLRSL | IPSSYIQ.RG | DQASIVGGAI  | DFVKILEQQL | Q |       |   |
| 14 | 97            | BAB01355   | EVEQRMTHI  | <b>AVERNRRRQEM</b> | NEHLRVLRSL | MPSYVQ.RG  | DQASIVGGAI  | EFVRELEQLL | Q |       |   |
| 15 | 96            | AAG51804   | EIENQRMTHI | <b>AVERNRRRQEM</b> | NEYLAVLRSL | MPPYAAQ.RG | DQASIVGGAI  | NYLKELEHHL | Q |       |   |
| 16 | 94            | NM102098   | EIENQRMTHI | <b>AVERNRRRQEM</b> | NEYLAVLRSL | MPSYAAQ.RG | DQASIVGGAI  | NYVKELEHLL | Q |       |   |
| 17 | 71            | NM124039   | EAENQRMTHI | <b>AVERNRRRQEM</b> | NQHLVLRSL  | MPQPFVH.KG | DQASIVGGAI  | DFIKELEHKL | L |       |   |
| 18 | 99            | BAB11554   | DKENQRMNHI | <b>AVERNRRRQEM</b> | NHFLSILKSM | MPLSYSQ.PN | DQASIVGGAI  | SYLKKLEQRL | Q |       |   |
| 19 | 98            | BAB09783   | QDQQQKMSHV | <b>AVERNRRRQEM</b> | NEHLTVLRSL | MPCFYVK.RG | DQASIVGGAI  | EYISELQQLV | Q |       |   |
| 20 | 45            | AAF30305   | .....MSHI  | <b>AVERNRRRQEM</b> | NEHLKSLRSL | TPCFYIK.RG | DQASIVGGAI  | EFIKELQQLV | Q |       |   |
| 21 | 95            | AAG13058   | EESPDHEIHI | <b>WTERERRRQEM</b> | RDMFSLKHAL | LPQ.LPP.KA | DKSTIVDEAV  | SSIKSLEQTL | Q |       |   |
| 22 | 92            | BAB11628   | PEKERSRRHM | <b>LKERTTREKQ</b>  | KQSYLALHSL | LPFA...TKN | DKNSIVEKAV  | DEAIAKLQRL | Q |       |   |
| 23 | 10            | AAD20667   | GRGSRKSRTS | <b>PTERERRVHF</b>  | NDRFFDLKNL | IPNP...TKI | DRASIVGEAI  | DYIKELLRTI | E |       |   |
| 24 | 89            | AAF80214   | GRGSKRKRIF | <b>PTERERRVHF</b>  | KDRFGDLKNL | IPNP...TKN | DRASIVGEAI  | DYIKELLRTI | E |       |   |
| 25 | 91            | AAD20666   | GRGKRKNKPF | <b>PTERERRRCHL</b> | NEREVALKLL | IPSP...SKG | DRASILQDGI  | DYINELRRRV | S |       |   |
| 26 | 19            | AAC63587   | RSPVLAKEHV | <b>LAERKRREKL</b>  | SEKFIALSAL | LPGL...KKA | DKVTILDDAI  | SRMKQLQEQV | R |       |   |
| 27 | 20            | AAC63588   | REPHLLKEHV | <b>LAERKRREKL</b>  | NERLIALSAL | LPGL...KKT | DKATVLEDAI  | KHLKQLQERV | K |       |   |
| 28 | 18            | AAC63586   | SSQNSAQDHI | <b>LAERKRREKL</b>  | TQRFVALSAL | IPGL...KKM | DKASVLDGAI  | KHIKYLQESV | K |       |   |
| 29 | 25            | CAB38933   | RNQSNAQDHI | <b>LAERKRREKL</b>  | TQRFVALSAL | VPGL...KKM | DKASVLDGAI  | KHIKYLQERV | Q |       |   |
| 30 | 2             | AAB72192   | HTRGKPGNHA | <b>LSERKRREKL</b>  | NERFMTLRSL | IPSI...SKI | DKVSILDDTI  | EYLQDLQKRV | G |       |   |
| 31 | 1             | BAB08530   | EARDETGSHA | <b>VLEKKRREKL</b>  | NERFMTLRSL | IPSI...NKI | DKVSILDDTI  | EYLQELERRV | Q |       |   |
| 32 | 42            | CAC14865   | RLPREDLSHV | <b>VAERRRREKL</b>  | NEKFITLRSM | VPFV...TKM | DKVSILGDTI  | AYVNHLRKRV | H |       |   |
| 33 | 14            | AAB62853   | KHHPAVLSHV | <b>EAERQRREKL</b>  | NHRFYALRAI | VPKV...SRM | DKASLLSDAV  | SYIESLKSKI | R |       |   |
| 34 | 3             | CAB78685   | NGREEALNHV | <b>EAERQRREKL</b>  | NQRFYALRAV | VPNI...SKM | DKASLLGDAI  | TYITDMQKDI | O |       |   |
| 35 | 17            | AAD20162   | NGREEPLNHV | <b>EAERQRREKL</b>  | NQRFYALRSV | VPNI...SKM | DKASLLGDAI  | SYIKELQEKV | K |       |   |
| 36 | 5             | BAB08920   | NGREEPLNHV | <b>EAERQRREKL</b>  | NQRFYALRSV | VPNV...SKM | DKASLLGDAI  | SYINELKSKL | Q |       |   |
| 37 | 4             | CAA17131   | NGREEPLNHV | <b>EAERQRREKL</b>  | NQRFYALRAV | VPNV...SKM | DKASLLGDAI  | SYISELKSCL | Q |       |   |
| 38 | 6             | BAA25078   | NGREEPLNHV | <b>EAERQRREKL</b>  | NQRFYALRAV | VPNV...SKM | DKASLLGDAI  | AYINELKSKV | V |       |   |
| 39 | 13            | AAF97322   | NGRAEALNHV | <b>EAERQRREKL</b>  | NQRFYALRSV | VPNI...SKM | DKASLLGDAV  | SYINELHAKL | K |       |   |
| 40 | 28            | BAA97217   | HGRDKPLNHV | <b>EAERMREKL</b>   | NHRFYALRAV | VPNV...SKM | DKTSLLEDAV  | CYINELKSKA | E |       |   |
| 41 | 35            | BAA97365   | AASSPASKNI | <b>VSERNRRQKL</b>  | NQRLFALRSV | VPNI...TKM | DKASIVKDAI  | SYIEGLQYEE | K |       |   |
| 42 | 27            | CAB43668   | ATSPASSKNV | <b>VSERNRRQKL</b>  | NQRLFALRSV | VPNI...SKL | DKASIVKDSI  | DYMQLIDQE  | K |       |   |
| 43 | 29            | AAC98450   | KTKTDRSRTL | <b>VSERRRRGRM</b>  | KDKLYALRSL | VPNI...TKM | DKASIVGDAV  | LYVQELQSQA | K |       |   |
| 44 | 33            | AAF78492   | KKKGMPAKNL | <b>MAERRRRKKL</b>  | NDRLYMLRSV | VPKI...SKM | DRASILGDAI  | DYKELLQRI  | N |       |   |
| 45 | 116           | NM113586   | KKKGMPAKNL | <b>MAERRRRKKL</b>  | NDRLYMLRSV | VPKI...SKM | DRASILGDAI  | DYKELLQRI  | N |       |   |
| 46 | 61            | CAB89386   | KLEGQPSKNL | <b>MAERRRRRKL</b>  | NDRLSLLRSL | VPKI...TKM | DRASILGDAI  | DYMKELLDKI | N |       |   |
| 47 | 93            | NM125962   | KLEGQPSKNL | <b>MAERRRRRKL</b>  | NDRLSLLRSL | VPKI...SKM | DRASILGDAI  | DYMKELLDKI | N |       |   |
| 48 | 21            | AAC64222   | SGKGSQAKNL | <b>MAERRRRRKL</b>  | NDRLYALRSL | VPRI...TKL | DRASILGDAI  | NYVKELQNEA | K |       |   |
| 49 | 22            | CAB79132   | EDENFKSPNL | <b>EAERRRREKL</b>  | HCRLMALRSH | VPIV...TNM | TKASIVEDAI  | TYIGELQNNV | K |       |   |
| 50 | 90            | AAD39586   | PTENFKSKNL | <b>HSERKRREKL</b>  | NQAMYGLRAV | VPKI...TKL | NKIGIFSDAV  | DYINELLVEK | Q |       |   |
| 51 | 41            | BAA97026   | GPSATQLQHM | <b>ISEKRREKL</b>   | NSFQALRSL  | LPPG...TKK | DKASVLSIAR  | EQLSSLQGEI | S |       |   |
| 52 | 134           | CAB80472   | SKEVAACKHS | <b>DAERRRRLRI</b>  | NESFATLRTI | LPNL...VKQ | DKASVLTGETV | RYFNELKMMV | Q |       |   |
| 53 | 30            | AAF07352   | KALAASKSHS | <b>EAERRRRERI</b>  | NNHLAKLRSL | LPNT...TKT | DKASLLAEVI  | QHVKELKRET | S |       |   |
| 54 | 32            | BAA95758   | KALAASKSHS | <b>EAERRRRERI</b>  | NTHLAKLRSL | LPNT...TKT | DKASLLAEVI  | QHMKELKRQT | S |       |   |

| EN  | AtbHLH<br>Number | PID<br>Number | BASIC      |            | HELIX       |            |       | LOOP        | HELIX      |   |   |   |   |
|-----|------------------|---------------|------------|------------|-------------|------------|-------|-------------|------------|---|---|---|---|
|     |                  |               | 1          | 0          | E           | R          | 2     | 0           | 3          | 0 | 4 | 0 | 5 |
| 55  | 107              | CAC00740      | KALASLRNHK | EAERKRRARI | NSHLNKLRLK  | LSCN...    | SKT   | DKSTLLAKVV  | QRVKELKQQT | L |   |   |   |
| 56  | 106              | AAD11998      | RALAALRNHK | EAERRRRERI | NSHLNKLNRV  | LSCN...    | SKT   | DKATLLAKVV  | QRVRELKQQT | L |   |   |   |
| 57  | 51               | AAD25935      | KAESLSRSHR | LAEKRRRDRI | NSHLTALRLK  | VPNS...    | DKL   | DKAALLATVI  | EQVKELKQKA | A |   |   |   |
| 62  | 103              | CAA20199      | IDYIKFLQEQ | ITEKVRKEKL | GDRITALQQL  | VSPF...    | GKT   | DTASVLHDAI  | DYIKFLQEQI | D |   |   |   |
| 69  | 130              | AAB88652      | KRGCATHPRS | IAEVRRTTRI | SERMRKLQEL  | VPNM...    | DKQT  | NTSDMLDLAV  | DYIKDLQRQY | K |   |   |   |
| 70  | 122              | AAG50543      | KRGCATHPRS | IAEVRRTKI  | SERMRKLQDL  | VPNM...    | DTQT  | NTADMLDLAV  | QYIKDLQEQV | K |   |   |   |
| 71  | 80               | AAG12608      | KRGCATHPRS | IAEVRRTRI  | SDRIRRLQEL  | VPNM...    | DKQT  | NTADMLEEAV  | EYVKALQSQI | Q |   |   |   |
| 72  | 81               | CAB78042      | KRGCATHPRS | IAEVRRTRI  | SDRIRKLQEL  | VPNM...    | DKQT  | NTADMLEEAV  | EYVKVLQRQI | Q |   |   |   |
| 73  | 129              | AAC64303      | KRGFATHPRS | IAERERTRI  | SGKLLKLQEL  | VPNM...    | DKQT  | SYADMLDLAV  | EHIKGLQHQV | E |   |   |   |
| 74  | 128              | AAF29386      | KRGCATHPRS | IAERERTRI  | SGKLLKLQDL  | VPNM...    | DKVT  | SYSMDLDLAV  | QHIKGLQHQI | Q |   |   |   |
| 75  | 136              | AAG28811      | KRGQATDSHS | IAEVRREKI  | NERLKCLQDL  | VPGC...    | YKAM  | GMAVMLDVLQ  | NQIEFLSMKL | S |   |   |   |
| 76  | 50               | AAF24852      | RRGQATDSHS | IAEVRRGKI  | NERLKCLQDI  | VPGC...    | YKTM  | GMATMLDEII  | NYVQSLQNV  | E |   |   |   |
| 77  | 44               | AAF25996      | RRGQATDSHS | IAEVRRGKI  | NERLRCLQDM  | VPGC...    | YKAM  | GMATMLDEII  | NYVQSLQNV  | E |   |   |   |
| 78  | 75               | NP564229      | KRGQATDSHS | IAEVRREKI  | NERLKCLQDL  | VPGC...    | YKAM  | GMAVMLDVI   | DYVRSLQNI  | E |   |   |   |
| 79  | 64               | AAD15506      | RRGQATDRHS | LAERARREKI | SKMKYLQDI   | VPGC...    | NKVT  | GKAGMLDEII  | NYVQCLQRQV | E |   |   |   |
| 80  | 58               | CAB80320      | RRGEATDRHS | LAERARREKI | SKMKCLQDI   | VPGC...    | NKVT  | GKAGMLDEII  | NYVQSLQQV  | E |   |   |   |
| 81  | 79               | BAA97208      | RRGQATDRHS | LAERARREKI | SEKMTALQDI  | IPGC...    | NKII  | GKALVLDEII  | NYIQSLQRQV | E |   |   |   |
| 82  | 49               | AAF07355      | RRGQATNSHS | IAEVRREKI  | SERMKFLQDL  | VPGC...    | NKVT  | GKAVMLDEII  | NYVQSLQRQV | E |   |   |   |
| 83  | 76               | AAG29214      | RRGQATNSHS | IAEVRREKI  | SERMKFLQDL  | VPGC...    | DKVT  | GKAVMLDEII  | NYVQSLQCCI | E |   |   |   |
| 84  | 63               | CAA18832      | RRGQATDSHS | IAEVRREKI  | SERMKFLQDI  | VPGC...    | DKIT  | GKALMLDEII  | NYVQSLQRV  | E |   |   |   |
| 85  | 62               | AAF02164      | RRGQATDSHS | IAEVRREKI  | SERMKLLQDL  | VPGC...    | NKVT  | GKALMLDEII  | NYVQSLQRV  | E |   |   |   |
| 86  | 78               | BAB10689      | RRGQATDSHS | IAEVRREKI  | GERMKLLQDL  | VPGC...    | NKVT  | GKALMLDEII  | NYVQSLQRV  | E |   |   |   |
| 87  | 77               | BAB01846      | RRGQATDSHS | IAERARREKI | SERMTLLQDL  | VPGC...    | NRIT  | GKAVMLDEII  | NYVQSLQRV  | E |   |   |   |
| 88  | 31               | BAA87957      | RRGQATDSHS | LAERARREKI | SERMKILQDL  | VPGC...    | NKVI  | GKALVLDEII  | NYIQSLQRQV | E |   |   |   |
| 89  | 137              | AF428350      | RRGQATDSHS | IAEVRREKI  | SERMRTLQNL  | VPGC...    | DKVT  | GKALMLDEII  | NYVQTLQRV  | E |   |   |   |
| 90  | 74               | AAC34336      | RRGQATNSHS | IAEVRREKI  | SERMRLQEL   | VPGC...    | NKVV  | IGAVMLDEII  | NYVQSLQQV  | E |   |   |   |
| 91  | 60               | CAB67608      | RRGQATDSHS | IAERARREKI | NARMKLLQEL  | VPGC...    | DKIQ  | GTALVLDEII  | NHVQSLQRV  | E |   |   |   |
| 92  | 7                | AAD25805      | RRGQATDPHS | IAERLRRERI | AERIRSLQEL  | VPTV...    | NK.T  | DRAAMIDEIV  | DYVKFLRLQV | K |   |   |   |
| 93  | 59               | CAB80752      | RRGQATDPHS | IAERLRRERI | AERIRSLQEL  | VPTV...    | NK.T  | DRAAMIDEIV  | DYVKFLRLQV | K |   |   |   |
| 94  | 69               | CAA18195      | RRGQATDPHS | IAERLRRERI | AERMKSLQEL  | VPNG...    | NK.T  | DKASMLDEII  | DYVKFLQLQV | K |   |   |   |
| 95  | 66               | AAD03387      | RRGQATDPHS | IAERLRRERI | AERMKALQEL  | VPNG...    | NK.T  | DKASMLDEII  | DYVKFLQLQV | K |   |   |   |
| 96  | 82               | BAA97525      | RRGQATDPHS | IAERLRRERI | AERMKSLQEL  | VPNT...    | NK.T  | DKASMLDEII  | EYVRFLLQV  | K |   |   |   |
| 98  | 73               | BAB10945      | KRNIDAQFHN | LSEKRRRSKI | NEKMKALQKL  | IPNS...    | NK.T  | DKASMLDEAI  | EYLKQLQLQV | Q |   |   |   |
| 99  | 24               | CAB80359      | KRCRAAEVHN | LSEKRRRSRI | NEKMKALQSL  | IPNS...    | NK.T  | DKASMLDEAI  | EYLKQLQLQV | Q |   |   |   |
| 100 | 8                | AAC33213      | KRSRAAEVHN | LSERRRRDRI | NEKMRALQEL  | IPNC...    | NK.V  | DKASMLDEAI  | EYLKSLQLQV | Q |   |   |   |
| 101 | 15               | AAD24380      | KRSRAAEVHN | LSERKRRDRI | NERMKALQEL  | IPRC...    | NK.S  | DKASMLDEAI  | EYMKSLQLQI | Q |   |   |   |
| 102 | 9                | AAD22130      | RRSRAAEVHN | LSERRRRDRI | NERMKALQEL  | IPHC...    | SK.T  | DKASILDEAI  | DYLKSLQLQL | Q |   |   |   |
| 103 | 65               | CAB86934      | RRSRAAEVHN | LSERRRRDRI | NERMKALQEL  | IPHC...    | SR.T  | DKASILDEAI  | DYLKSLQMLQ | Q |   |   |   |
| 104 | 119              | CAA22971      | KRSRAADMHN | LSERRRREKI | NERMKTLQEL  | LPRC...    | RK.V  | DKVSMLEDVI  | EYVKSLQLQI | Q |   |   |   |
| 105 | 138              | CAA2297B      | KRSRAEMHN  | LAERRRREKI | MERNKTLQQL  | LPRC...    | NK.V  | DKVSMLEDVI  | EYVKSLQMI  | Q |   |   |   |
| 106 | 56               | CAA22972      | KRSRTAEMHN | LAERRRREKI | NEKMKTLQQL  | LPRC...    | NK.V  | EKVSTLDDAI  | EYVKSLQSQI | Q |   |   |   |
| 107 | 23               | CAB81467      | KRSRAAIMHK | LSERRRRQKI | NEMMKALQEL  | LPRC...    | TK.T  | DRSSMLDDVI  | EYVKSLQSQI | Q |   |   |   |
| 108 | 16               | CAB80763      | KRSRAAAIHN | QSERKRRDKI | NQRMKTLQKL  | VPNS...    | SK.T  | DKASMLDEVI  | EYLKQLQAQV | Q |   |   |   |
| 109 | 72               | BAB08482      | RRGRAAAIHN | ESERRRRDRI | NQRMRTLQKL  | LPTA...    | SK.A  | DKVSILDDVI  | EHLKQLQAQV | Q |   |   |   |
| 110 | 124              | AAC34226      | KRKRSTEVHK | LYERKRRDEF | NKKMRALQDL  | LPNC...    | YK.D  | DKASLLDEAI  | KYMRTLQLQV | Q |   |   |   |
| 125 | 102              | AAF07356      | KASAIRSKHS | VTEQRRSKI  | NERFQILREL  | IPNS...    | EQKR  | DTASFLLVEI  | DYVQYLQEKV | Q |   |   |   |
| 126 | 46               | CAB93714      | KLNTPRSKHS | ATEQRRSKI  | NDRFQMLRQL  | IPNS...    | DQKR  | DKASFLLVEI  | EYIQFLQEKA | H |   |   |   |
| 127 | 141              | BAB08642      | NRNSCRSKHS | ETEQRRSKI  | NERFQSLMDI  | IPQNQNDQKR |       | DKASFLLVEI  | EYIHFLQEKV | H |   |   |   |
| 133 | 105              | BAB09934      | CESSATSSKA | CREKQRDRDL | NDFKFMELGAI | LEPG...    | NPPKT | DKAAILVDAV  | RMVTQLRGEA | Q |   |   |   |
| 134 | 115              | AAG50538      | ESCTGSNSKA | CREKQRDRDL | NDFKFTLSSV  | LEPG...    | RTPKT | DKVAIINDAI  | RMVNQARDEA | Q |   |   |   |
| 135 | 34               | BAA95734      | SCSKPG.TKA | CREKLRREKL | NDFKMDLSSV  | LEPG...    | RTPKT | DKSAILDDAI  | RVVNQLRGEA | H |   |   |   |
| 136 | 104              | CAB78483      | SCSRGGGTKA | CRELRLREKL | NERFMDLSSV  | LEPG...    | RTPKT | DKPAILLDDAI | RILNQLRDEA | L |   |   |   |
| 137 | 11               | AAL55718      | KKEAVCSQKA | EREKLRDKL  | KEQFLELQNA  | LDPN...    | R.PKS | DKASVLTDTI  | QMLKDVMMNV | D |   |   |   |
| 138 | 121              | NM112876      | DVSARKSQKA | GREKLRREKL | NEHFVELGNV  | LDPE...    | R.PKN | DKATILTDTV  | QLLKELTSEV | N |   |   |   |
| 139 | 47               | NM114632      | GKVPKRINKA | VRERLKRHL  | NELFIELADT  | LELN...    | Q.QNS | GKASILCEAT  | RFLKDVFGQI | E |   |   |   |

Total: 109 proteins

**b. Non E-box binders: proteins with a basic region, but not predicted to have E-box binding capacity.**

The proteins listed in this table have a considerable basic region (first 17 positions) and might bind DNA, but do not contain both of the amino acids considered to be required to recognize and E-Box (E13 and R16) (see Functional Categories Section). Proteins are listed according to the Entry Number assigned, and their AtbHLH Number and PID Number are also provided to identify them.

| EN  | AtbHLH<br>Number | PID<br>Number | BASIC                   |                                      | HELIX                   |             | LOOP       |                         | HELIX |  |
|-----|------------------|---------------|-------------------------|--------------------------------------|-------------------------|-------------|------------|-------------------------|-------|--|
|     |                  |               | 10 E R 2                | 0 3 0                                | 0 4 0                   | 0 5 0       | 0 6 0      |                         |       |  |
| 61  | 113              | BAA99700      | GKR <del>N</del> QEKSSV | GI <del>A</del> KV <del>R</del> KERL | GERIAALQQL              | VSPY...GKT  | DAASVLHEAM | GYIKFLQDQI              | Q     |  |
| 67  | 135              | AAF15922      | RRSRSRQSSG              | TSE <del>R</del> ISEDQI              | NDLI <del>I</del> KLQQL | LPRS...DKV  | SAARVLQDTC | NYIRNLHREV              | D     |  |
| 68  | 26               | AAK15282      | REVPSVTRKG              | SKRR <del>R</del> RDEKM              | SNKMRKLQQL              | VPNC...HK.T | DKVSVLDKTI | EYMKNLQLQL              | Q     |  |
| 111 | 132              | BAC10690      | KRKRNAEAYN              | SPE <del>R</del> NQRNDI              | NKKMRTLQNL              | LPNS...HK.D | DNESMLDEAI | NYMTNLQLQV              | Q     |  |
| 117 | 37               | CAB62312      | NVRISKDPQS              | VAARH <del>R</del> RERI              | SERIRILQRL              | VPGG...TK.M | DTASMLDEAI | HYVKFLKKQV              | Q     |  |
| 123 | 53               | AAC12822      | SKKPTLSSQS              | LAAR <del>G</del> RRRI               | AEKTHELGKL              | IPGG...NK.L | NTAEMFQAAA | KYVKFLQSQV              | G     |  |
| 124 | 52               | AAD25754      | TKKRELSAQ               | TAARK <del>R</del> RRRI              | TEKTQELGKL              | IPGS...QK.H | NTAEMFNAAA | KYVKFLQAQI              | E     |  |
| 131 | 145              | BAB10287      | RISFLKR <del>S</del> KL | SSNKIGEEKI                           | FETVSL <del>L</del> RSV | VPGE...ELV  | DPILVIDRAI | DY <del>L</del> KSLKMEA | K     |  |
| 132 | 108              | NM102341      | KSSDKSDHDT              | LLKK <del>R</del> RRERI              | RRQLET <del>L</del> KEI | TPNC...PQS  | DINAILDCVI | EY <del>T</del> NNLRLAH | Y     |  |
| 142 | 147              | BAA94998      | RSKKQRATVL              | RLKAKGLPAV                           | QRKVKVLSRL              | VPGC...RK.S | LPV.VLEETT | DYIAAMEMQI              | R     |  |
| 143 | 148              | AAF63634      | RSRKRRVSVL              | RLNKKSIPDV                           | NRKVRVLGRL              | VPGC...GKQS | VPV.ILEEAT | DYIQALEMQV              | R     |  |

Total: 11 proteins

Total number of proteins predicted to have some type of DNA binding capacity: 120 proteins.
