# Supplementary material
Source: PubMed Central journal article supplement (PMC167167)
Supplement: plntcell_15_8_1749__2.pdf [file plntcell_15_8_1749__2.pdf]

### Supplementary Material Table 2. AtbHLH proteins predicted to be Non-DNA-binders.

Amino acid sequences of the bHLH domains of the Arabidopsis proteins predicted to lack capacity to bind DNA, based on the absence of amino acid E13 and/or R16, and the presence of few basic residues in the first 17 positions (See Functional Categories Section). EN 129 has the pair E/R but only 3 basic residues in the first 17 positions, and for this reason was included as part of this category. Proteins are listed according to the Entry Number assigned, and their AtbHLH number and PID number is also provided to identify them. Positions within the bHLH domain are numbered at the top of the figure, below the schematic that indicates the basic, helix and loop regions of the domain.

| EN  | AtbHLH Number | PID Number | BASIC       |             | HELIX       |          | LOOP            | HELIX        |    |
|-----|---------------|------------|-------------|-------------|-------------|----------|-----------------|--------------|----|
|     |               |            | 10          | E R         | 20          | 30       | 40              | 50           | 60 |
| 58  | 12            | BAA11933   | MFPSONSGLN  | QDDPSDRRKE  | NEKFSVLRTM  | VPTV...  | NEVDKESILNNTI   | KYLQLEEARVE  |    |
| 59  | 110           | AAF24944   | PRVE.SRSSC  | PPFKVRKEKL  | GDRIAALQQL  | VSPF...  | GKTDASVLM EAI   | GYIKFLQSQIE  |    |
| 60  | 68            | CAB79668   | PRLQSPSSQ   | STLKV RKEKL | GGRIAALHQL  | VSPF...  | GKTDASV LSEAI   | GYIRFLQSQIE  |    |
| 63  | 123           | BAB02240   | RAKSEAASPS  | PAFK.RKEKM  | GDRIAALQQL  | VSPF...  | GKTD AASV LSEAI | EYIKFLHQQVS  |    |
| 64  | 112           | AAD21412   | KPRVTTPSPL  | PTFKVRKENL  | RDQITSLQQL  | VSPF...  | GKTDASV LQ EAI  | EYIKFLHDQVT  |    |
| 65  | 114           | CAB81059   | RPRLETLSPL  | PSFKVRKEKL  | GDRI TALQQL | VSPF...  | GKTDASV LNEAVE  | EYIKFLQEQVT  |    |
| 66  | 111           | AAF98179   | AKCSEGSTLS  | PEKELPKAKL  | RDKITTLQQL  | VSPF...  | GKTDASV LQ EAI  | TYINFYQEQVK  |    |
| 97  | 48            | AAD23713   | HSLAERVIHNL | LTDMARREKI  | NARMKLLQEL  | VPGC...  | DKIQGTALV LDEI  | INHVQTLQRQVE |    |
| 112 | 83            | AAG27834   | PTTSPKDPQS  | LAAKNRRERI  | SERL KILQEL | VPNG...  | TK.VDLVTMLEKAI  | SYVKFLQVQVK  |    |
| 113 | 86            | BAB10359   | ATTSPKDPQS  | LAAKNRRERI  | SERL KVLQEL | VPNG...  | TK.VDLVTMLEKAI  | GYVKFLQVQVK  |    |
| 114 | 54            | AAF24948   | TKGTATDPQS  | LYARKRREKI  | NERL KTLQNL | VPNG...  | TK.VDISTMLEEAV  | HYVKFLQLQIK  |    |
| 115 | 85            | CAA19870   | SRGAATDPQS  | LYARKRRERI  | NERL RILQNL | VPNG...  | TK.VDISTMLEEAV  | HYVKFLQLQIK  |    |
| 116 | 139           | ABO23030   | NRGIASDPQS  | LYARKRRERI  | NDRL KTLQSL | VPNG...  | TK.VDISTMLEDAV  | HYVKFLQLQIK  |    |
| 118 | 88            | NP201507   | NVRISKDPQS  | VAAHRRERI   | SERIRILQRL  | VPGG...  | TK.MDTASMLDEAI  | HYVKFLKKQVQ  |    |
| 119 | 43            | CAB89355   | NVRISDDPQS  | VAAHRRERI   | SERIRILQRL  | VPGG...  | TK.MDTASMLDEAI  | RYVKFLKRQIR  |    |
| 120 | 40            | CAB80770   | NVRISDDPQT  | VVARRRERIE  | SEKIRILKRI  | VPGG...  | AK.MDTASMLDEAI  | RYTKFLKRQVR  |    |
| 121 | 87            | BAB03046   | NVKISTDPQT  | VAAQRRERI   | SEKIRVLQTL  | VPGG...  | TK.MDTASMLDEAA  | NYLKF LRAQVK |    |
| 122 | 140           | CAB81914   | TSTLSTDPQS  | VAAARRRHRIS | SDRFKILQSM  | VPGG...  | AK.MDTVSM LDEAI | SYVKFLKAQIW  |    |
| 128 | 142           | BAB09865   | STKEDTGSGLS | NEQSSKDKI   | RTALKILES   | VPGA...  | KGNEALLLLDEAI   | DYLKLLKRDLI  |    |
| 130 | 144           | AAG52051   | QSLSGSASSS  | NNDGKGRKMK  | KKMMGVLRRI  | VPGG...  | EQMNTACV LDEAV  | QYLKSLKIEAQ  |    |
| 140 | 117           | BAB01396   | TSGSPTASND  | GGIITKRRI   | SDKIRSLEKLM | PWE...   | RKMNLAM.TLEESH  | KYIKFLQSQIA  |    |
| 141 | 146           | CAB81011   | DGIRILERPD  | KEGGNEEGGI  | EERLRELKLL  | LPGG...  | EEMNVEE.MLSEI   | GNYIKCLELQTI |    |
| 144 | 149           | NP563839   | GNCKSRKGLT  | ETNRIKLP    | VERKLIKLR   | VPGC...  | RKVSVPN.LLDEAT  | DYIAALEMQVR  |    |
| 145 | 150           | AAF26082   | LAAAIRGSGG  | SGRRRKLSAV  | GNRV RVLGGL | VPGC...  | RRTALPE.LLDETA  | DYIAALEMQVR  |    |
| 146 | 151           | AAB63827   | IMIRPRKSVE  | AASRRPCRAI  | HRRVKT LKEL | VPNT...  | KTSEGLDGLFRQT   | ADYILALEMKVK |    |
| 147 | 152           | AAF87154   | LVLKRQWLIG  | TTREGRS     | GSIQIKMRKLR | VLPGG... | RRLNQPDLLLTKT   | ADYIMHLELRIR |    |
| 129 | 143           | CAC05472   | SSKQETGSGLS | DEQSRKDKI   | HTALRILES   | VPGA...  | KGNEALLLLDEAI   | DYLKLLKQSLN  |    |

Total 27 proteins
