# Supplementary material
Source: PubMed Central journal article supplement (PMC167167)
Supplement: plntcell_15_8_1749__3.pdf [file plntcell_15_8_1749__3.pdf]

### Supplementary Material Table 3. Subclasses of predicted E-box-binding bHLH proteins.

#### a. AtbHLH proteins predicted to have G-box-binding capacity.

Amino acid sequences of the bHLH domains of the proteins identified in this study which are predicted to bind G-boxes based on the amino acids located in positions 9-13-17 (K/H-E-R), highlighted in bold letters (See Functional categories section). Proteins are listed according to the Entry Number assigned and their At-bHLH number and PID number are also provided to identify them. Positions within the bHLH are numbered at the top of the figure, below the schematic that indicates the basic, helix and loop regions of the domain.

| EN | AtbHLH Number | PID Number | BASIC       |                    |             | HELIX       |            |            | LOOP |   |   | HELIX |   |  |
|----|---------------|------------|-------------|--------------------|-------------|-------------|------------|------------|------|---|---|-------|---|--|
|    |               |            | K           | H                  | E           | R           | 0          | 1          | 2    | 3 | 4 | 5     | 6 |  |
| 1  | 55            | AAF79643   | EPKMKRAKHK  | <b>ELERQRRQEN</b>  | TSLFKILRVL  | LPSQYIKGKR  | SSADHVLEAV | NYIKDLQKKI | K    |   |   |       |   |  |
| 2  | 125           | AAF75809   | DRESKMKKHR  | <b>DIERQRRQEV</b>  | SSLFKRLRTL  | LPPFYIQGKR  | STSDHIVQAV | NYIKDLQIKI | K    |   |   |       |   |  |
| 3  | 126           | NM118673   | NKKKKKLLHR  | <b>DIERQRRQEM</b>  | ATLFLATLRTH | LPLKYIKGKR  | AVSDHVNQAV | NFIKDTQTRK | I    |   |   |       |   |  |
| 4  | 120           | NP199992   | TKKEKLLHR   | <b>NIERQRRQEM</b>  | AILFASLRSQ  | LPLKYIKGKR  | AMSDHVNQAV | SFIKDTQTRI | K    |   |   |       |   |  |
| 5  | 118           | NM118672   | ...MEKLVHK  | <b>EIERQRRQEM</b>  | ASLYASLRSL  | LPLEFIQGKR  | STSDQVKGAV | NYIDYLQRNI | K    |   |   |       |   |  |
| 6  | 36            | NM124557   | ...MEKMMHR  | <b>ETERQRRQEM</b>  | ASLYASLRSL  | LPLHFIQGKR  | STSDQVNEAV | NYIKYLQRKI | K    |   |   |       |   |  |
| 7  | 100           | AAC78547   | PVVVKLNLHN  | <b>ASERERRKKI</b>  | NTMFSSLRSC  | LPPNTQTKKL  | SVSATVSQAL | KYIPELQEQV | K    |   |   |       |   |  |
| 8  | 38            | CAB72167   | PVVVKLNLHN  | <b>ASERDRRKKI</b>  | NTLFSSLRSC  | LPASDQSKKL  | SIPETVSKSL | KYIPELQQQV | K    |   |   |       |   |  |
| 9  | 39            | CAB72168   | PVVVKLNLHN  | <b>ASERDRRKKI</b>  | NSLFSSLRSC  | LPASGQSKKL  | SIPATVSRSL | KYIPELQEQV | K    |   |   |       |   |  |
| 10 | 101           | NM120497   | VVLEKLLNLHN | <b>ASERDRRKKI</b>  | NALYSSLRAL  | LPLSDQKRL   | SIPMTVARVV | KYIPEQKQEL | Q    |   |   |       |   |  |
| 11 | 67            | CAB71902   | EIENQRINHI  | <b>AVERNRRRQEM</b> | NEHINSLRAL  | LPPSYIQ.RG  | DQASIVGGAI | NYVKVLEQII | Q    |   |   |       |   |  |
| 12 | 57            | CAB77716   | EVENQRMTHI  | <b>AVERNRRRQEM</b> | NEHLNSLRSL  | MPPSFLQ.RG  | DQASIVGGAI | DFIKLEQLL  | Q    |   |   |       |   |  |
| 13 | 70            | AAC33499   | EIESQRMTHI  | <b>AVERNRRRQEM</b> | NVHLNSLRSL  | IPSSYIQ.RG  | DQASIVGGAI | DFVKILEQQL | Q    |   |   |       |   |  |
| 14 | 97            | BAB01355   | EVESQRMTHI  | <b>AVERNRRRQEM</b> | NEHLRVLRSL  | MPGSYVQ.RG  | DQASIVGGAI | EFVRELEQLL | Q    |   |   |       |   |  |
| 15 | 96            | AAG51804   | EIENQRMTHI  | <b>AVERNRRRQEM</b> | NEYLAVLRSL  | MPPYYAQ.RG  | DQASIVGGAI | NYLKELEHHL | Q    |   |   |       |   |  |
| 16 | 94            | NM102098   | EIENQRMTHI  | <b>AVERNRRRQEM</b> | NEYLAVLRSL  | MPSSYVQ.RG  | DQASIVGGAI | NYVKELEHHL | Q    |   |   |       |   |  |
| 17 | 71            | NM124039   | EAENQRMTHI  | <b>AVERNRRRQEM</b> | NQHLVSLRSL  | MPQPFVH.KG  | DQASIVGGAI | DFIKLEHKL  | L    |   |   |       |   |  |
| 18 | 99            | BAB11554   | DKENQRMNHI  | <b>AVERNRRRQEM</b> | NHFLSILKSM  | MPLSYSQ.PN  | DQASIVGGAI | SYLKKLEQRL | Q    |   |   |       |   |  |
| 19 | 98            | BAB09783   | QDQKQKMSHV  | <b>IVERNRRRQEM</b> | NEHLTVLRSL  | MPCFYVH.KG  | DQASIVGGAI | EYISELQQLV | Q    |   |   |       |   |  |
| 20 | 45            | AAF30305   | .....MSHI   | <b>AVERNRRRQEM</b> | NEHLKSLRSL  | TPCFYIK.RG  | DQASIVGGAI | EFIKELQQLV | Q    |   |   |       |   |  |
| 21 | 95            | AAG13058   | EESPDEIHI   | <b>WTERRRRKKM</b>  | RDMFSKLHAL  | LPQ.LPP.KA  | DKSTIVDEAV | SSIKSLEQLT | Q    |   |   |       |   |  |
| 22 | 92            | BAB11628   | PEKERSRRHM  | <b>LKERTRREKQ</b>  | KQSYLALHSL  | LPFA...TKN  | DKNSIVEKAV | DEAIKQLQRL | Q    |   |   |       |   |  |
| 26 | 19            | AAC63587   | RSPVLAKEHV  | <b>LAERKRREKL</b>  | SEKFIALSAL  | LPGL...KKA  | DKVTILDDAI | SRMKQLQEQV | R    |   |   |       |   |  |
| 27 | 20            | AAC63588   | REPHLLKEHV  | <b>LAERKRREKL</b>  | NERLIALSAL  | LPGL...KKT  | DKATVLEDAI | KHLKQLQERV | K    |   |   |       |   |  |
| 28 | 18            | AAC63586   | SSQNSAQDHI  | <b>LAERKRREKL</b>  | TQRFVLSAL   | IPGL...KKM  | DKASVLDGAI | KHIKYLQESV | K    |   |   |       |   |  |
| 29 | 25            | CAB38933   | RNQSNAQDHI  | <b>LAERKRREKL</b>  | TQRFVLSAL   | VPGL...KKM  | DKASVLDGAI | KHIKYLQERV | G    |   |   |       |   |  |
| 30 | 2             | AAB72192   | HTRGKPGNHA  | <b>LSSEKRRREKL</b> | NERFMTLRSL  | IPSI...SKI  | DKVSILDDTI | EYLQDLQKRV | Q    |   |   |       |   |  |
| 31 | 1             | BAB08530   | EARDETGNHA  | <b>VLEKRRREKL</b>  | NERFMTLRSL  | IPSI...NKI  | DKVSILDDTI | EYLQELERV  | Q    |   |   |       |   |  |
| 32 | 42            | CAC14865   | RLPREDLSHV  | <b>VAERRRREKL</b>  | NEKFITLRSM  | VFPV...TKM  | DKVSILGDTI | AYVNHRLKRV | H    |   |   |       |   |  |
| 33 | 14            | AAB62853   | KHHPAVLSHV  | <b>EAERQRREKL</b>  | NHRFYALRAI  | VPKV...SRM  | DKASVLDGAI | SYIESLKSKI | D    |   |   |       |   |  |
| 34 | 3             | CAB78685   | NGREEALNHV  | <b>EAERQRREKL</b>  | NQRFYALRAV  | VPNI...SKM  | DKASVLDGAI | TYITDMQKKI | R    |   |   |       |   |  |
| 35 | 17            | AAD20162   | NGREEPLNHV  | <b>EAERQRREKL</b>  | NQRFYALRSV  | VPNI...SKM  | DKASVLDGAI | SYIKELQEKV | K    |   |   |       |   |  |
| 36 | 5             | BAB08920   | NGREEPLNHV  | <b>EAERQRREKL</b>  | NQRFYALRSV  | VPNV...SKM  | DKASVLDGAI | SYINELKSKL | Q    |   |   |       |   |  |
| 37 | 4             | CAA17131   | NGREEPLNHV  | <b>EAERQRREKL</b>  | NQRFYALRAV  | VPNV...SKM  | DKASVLDGAI | SYISELKSKL | Q    |   |   |       |   |  |
| 38 | 6             | BAA25078   | NGREEPLNHV  | <b>EAERQRREKL</b>  | NQRFYALRAV  | VPNV...SKM  | DKASVLDGAI | AYINELKSKV | V    |   |   |       |   |  |
| 39 | 13            | AAF97322   | NGRAEALNHV  | <b>EAERQRREKL</b>  | NQRFYALRSV  | VPNI...SKM  | DKASVLDGAI | SYINELHAKL | K    |   |   |       |   |  |
| 40 | 28            | BAA97217   | HGRDKPLNHV  | <b>EAERMRRREKL</b> | NHRFYALRAV  | VPNV...SKM  | DKASVLDGAI | CYINELKSKA | E    |   |   |       |   |  |
| 51 | 41            | BAA97026   | GPSATQLQHM  | <b>ISERKRREKL</b>  | NSFQALRSL   | LPPG...TKK  | DKASVLSIAR | EQLSSLQGEI | S    |   |   |       |   |  |
| 52 | 134           | CAB80472   | SKEVAACKHS  | <b>DAERRRRLRI</b>  | NSQFATLRTI  | LPNL...VKQ  | DKASVLDGAI | RYFNELKMMV | Q    |   |   |       |   |  |
| 53 | 30            | AAF07352   | KALAASKSHS  | <b>EAERRRRERI</b>  | NNHLAKLRSL  | LPNT...TKT  | DKASVLDGAI | QHVKELKRET | S    |   |   |       |   |  |
| 54 | 32            | BAA95758   | KALAASKSHS  | <b>EAERRRRERI</b>  | NTHLAKLRSL  | LPNT...TKT  | DKASVLDGAI | QHMKELKRET | S    |   |   |       |   |  |
| 55 | 107           | CAC00740   | KALASLRNHK  | <b>EAERKRREKL</b>  | NSHLNKLRSL  | LSCN...SKT  | DKATLLAKVV | QRVKELKQQT | L    |   |   |       |   |  |
| 56 | 106           | AAD11998   | RALAALRNHK  | <b>EAERRRRERI</b>  | NSHLNKLRSL  | LSCN...SKT  | DKATLLAKVV | QRVKELKQQT | L    |   |   |       |   |  |
| 57 | 51            | AAD25935   | KAESLSRSHR  | <b>LAERKRREKL</b>  | NSHLTALRSL  | VPNS...DKL  | DKAALLATVI | EYVRSKQQA  | A    |   |   |       |   |  |
| 75 | 136           | AAG28811   | KRGQATDSHS  | <b>LAERVRRREKL</b> | NERLKCLQDL  | VPGC...YKAM | GMVMLDVLQ  | NQIEFLSMKL | S    |   |   |       |   |  |
| 76 | 50            | AAF24852   | RRGQATDSHS  | <b>LAERVRRREKL</b> | NERLKCLQDI  | VPGC...YKTM | GMATMLDEII | NYVQSLQNV  | E    |   |   |       |   |  |
| 77 | 44            | AAF25996   | RRGQATDSHS  | <b>LAERVRRREKL</b> | NERLRCLQDM  | VPGC...YKAM | GMATMLDEII | NYVQSLQNV  | E    |   |   |       |   |  |
| 78 | 75            | NP564229   | KRGQATDSHS  | <b>LAERVRRREKL</b> | NERLKCLQDL  | VPGC...YKAM | GMVMLDVLQ  | DYVRSKQQA  | E    |   |   |       |   |  |
| 79 | 64            | AAD15506   | RRGQATDRHS  | <b>LAERARREKL</b>  | SKMKYLQDI   | VPGC...NKVT | GKAGMLDEII | NYVQSLQNV  | E    |   |   |       |   |  |
| 80 | 58            | CAB80320   | RRGQATDRHS  | <b>LAERARREKL</b>  | SKMKYLQDI   | VPGC...NKVT | GKAGMLDEII | NYVQSLQNV  | E    |   |   |       |   |  |

| EN  | AtbHLH<br>Number | PID<br>Number | BASIC      |             |             |             | HELIX       |             |   | LOOP | HELIX |   |   |   |
|-----|------------------|---------------|------------|-------------|-------------|-------------|-------------|-------------|---|------|-------|---|---|---|
|     |                  |               | H          | 1           | 0           | E           | R           | 2           | 0 | 3    | 0     | 4 | 0 | 5 |
| 81  | 79               | BAA97208      | RRGQATDRHS | LAERARREKI  | SEKMTALQDI  | IPGC..NKII  | GKALVLDEII  | NYIQSLQRQV  | E |      |       |   |   |   |
| 82  | 49               | AAF07355      | RRGQATNSHS | LAERVRREKI  | SERMKFLQDL  | VPGC..NKVT  | GKAVMLDEII  | NYVQSLQRQV  | E |      |       |   |   |   |
| 83  | 76               | AAG29214      | RRGQATNSHS | LAERVRREKI  | SERMKFLQDL  | VPGC..DKVT  | GKAVMLDEII  | NYVQSLQCCI  | E |      |       |   |   |   |
| 84  | 63               | CAA18832      | RRGQATDSHS | LAERVRREKI  | SERMKFLQDL  | VPGC..DKIT  | GKAGMLDEII  | NYVQSLQRQI  | E |      |       |   |   |   |
| 85  | 62               | AAF02164      | RRGQATDSHS | LAERVRREKI  | SERMKLLQDL  | VPGC..NKVT  | GKALMLDEII  | NYVQSLQRQV  | E |      |       |   |   |   |
| 86  | 78               | BAB10689      | RRGQATDSHS | LAERVRREKI  | SERMKLLQDL  | VPGC..NKVT  | GKALMLDEII  | NYVQSLQRQV  | E |      |       |   |   |   |
| 87  | 77               | BAB01846      | RRGQATDSHS | LAERARREKI  | SERMRTLQDL  | VPGC..NRIT  | GKAVMLDEII  | NYVQSLQRQV  | E |      |       |   |   |   |
| 88  | 31               | BAA87957      | RRGQATDSHS | LAERARREKI  | SERMKILQDL  | VPGC..NKVI  | GKALVLDEII  | NYIQSLQRQV  | E |      |       |   |   |   |
| 89  | 137              | AF428350      | RRGQATDSHS | LAERVRREKI  | SERMRTLQNL  | VPGC..DKVT  | GKALMLDEII  | NYVQTLQTQV  | E |      |       |   |   |   |
| 90  | 74               | AAC34336      | RRGQATNSHS | LAERVRREKI  | SERMRLQEL   | VPGC..NKVV  | TGAVMLDEII  | NYVQSLQQQV  | E |      |       |   |   |   |
| 91  | 60               | CAB67608      | RRGQATDSHS | LAERARREKI  | NARMKLLQEL  | VPGC..DKIQ  | GTALVLDEII  | NHVQSLQRQV  | E |      |       |   |   |   |
| 92  | 7                | AAD25805      | RRGQATDPHS | LAERLRREKI  | AERIRSLQEL  | VPTV..NK.T  | DRAAMIDEIV  | DYVKFLRLQV  | K |      |       |   |   |   |
| 93  | 59               | CAB80752      | RRGQATDPHS | LAERLRREKI  | AERIRALQEL  | VPTV..NK.T  | DRAAMIDEIV  | DYVKFLRLQV  | K |      |       |   |   |   |
| 94  | 69               | CAA18195      | RRGQATDPHS | LAERLRREKI  | AERMKSLQEL  | VPNG..NK.T  | DKASMLDEII  | DYVKFLRLQV  | K |      |       |   |   |   |
| 95  | 66               | AAD03387      | RRGQATDPHS | LAERLRREKI  | AERMKALQEL  | VPNG..NK.T  | DKASMLDEII  | DYVKFLRLQV  | K |      |       |   |   |   |
| 96  | 82               | BAA97525      | RRGQATDPHS | LAERLRREKI  | AERMKSLQEL  | VPNT..NK.T  | DKASMLDEII  | EYVRFLLQV   | K |      |       |   |   |   |
| 98  | 73               | BAB10945      | KRNIDAQFHN | LSEKRRRSKI  | NEKMKALQKL  | IPNS..NK.T  | DKASMLDEAI  | EYLKQLQLQV  | Q |      |       |   |   |   |
| 99  | 24               | CAB80359      | KRCRAAEVHN | LSEKRRRSKI  | NEKMKALQSL  | IPNS..NK.T  | DKASMLDEAI  | EYLKQLQLQV  | Q |      |       |   |   |   |
| 100 | 8                | AAC33213      | KRSRAAEVHN | LSEKRRRSKI  | NEKMRALQEL  | IPNC..NK.V  | DKASMLDEAI  | EYKLSLQLQV  | Q |      |       |   |   |   |
| 101 | 15               | AAD24380      | KRSRAAEVHN | LSERKRRDRI  | NERMKALQEL  | IIRC..NK.S  | DKASMLDEAI  | EYMKSLQLQI  | Q |      |       |   |   |   |
| 102 | 9                | AAD22130      | RRSRAAEVHN | LSERKRRDRI  | NERMKALQEL  | IPHC..SK.T  | DKASILDEAI  | DYKLSLQLQL  | Q |      |       |   |   |   |
| 103 | 65               | CAB86934      | RRSRAAEVHN | LSERKRRDRI  | NERMKALQEL  | IPHC..SR.T  | DKASILDEAI  | DYKLSLQMLQ  | Q |      |       |   |   |   |
| 104 | 119              | CAA22971      | KRSRAADMHN | LSERKRRREKI | NERMKTLQEL  | LPRC..RK.V  | DKVSMLEDAI  | EYVKSLQLQI  | Q |      |       |   |   |   |
| 105 | 138              | CAA2297B      | KRSRAAEVHN | LAERVRREKI  | MERNKTLQEL  | LPRC..NK.V  | DKVSMLEDAI  | EYVKSLQEMQI | Q |      |       |   |   |   |
| 106 | 56               | CAA22972      | KRSRAAEVHN | LAERVRREKI  | NEKMKTLQEL  | LPRC..NK.V  | EKVSTLDDAI  | EYVKSLQSQI  | Q |      |       |   |   |   |
| 107 | 23               | CAB81467      | KRSRAAEVHN | LSERKRRQKI  | NEMMKALQEL  | LPRC..TK.T  | DRSSMLDDVI  | EYVKSLQSQI  | Q |      |       |   |   |   |
| 108 | 16               | CAB80763      | KRSRAAEVHN | QSERKRRDKI  | NQRMKTLQKL  | VPNS..SK.T  | DKASMLDEVI  | EYKQLQLQAV  | Q |      |       |   |   |   |
| 109 | 72               | BAB08482      | RRGRAAAIHN | QSERKRRDRI  | NQRMKTLQKL  | LPTA..SK.A  | DKVSILDDVI  | EHLKQLQAV   | Q |      |       |   |   |   |
| 110 | 124              | AAC34226      | KRKRSTEVHK | LYERKRRDEF  | NKKMRALQDL  | LPNC..YK.D  | DKASMLDEAI  | KYMRTLQLQV  | Q |      |       |   |   |   |
| 125 | 102              | AAF07356      | KASAIRSKHS | VTEQRRRSKI  | NERFQILREL  | IPNS..EQKR  | DTASFILLEVI | DYVQYLQEKV  | Q |      |       |   |   |   |
| 126 | 46               | CAB93714      | KLNTPRSKHS | ATEQRRRSKI  | NDRFQMLRQI  | IPNS..DQKR  | DKASFLLEVI  | EYIQFLQEKA  | H |      |       |   |   |   |
| 127 | 141              | BAB08642      | NRNSCRSKHS | ETEQRRRSKI  | NERFQSLMDI  | IPQNQNDQKR  | DKASFLLEVI  | EYIHFLQEKV  | H |      |       |   |   |   |
| 133 | 105              | BAB09934      | CESSATSSKA | CREKQRRDRL  | NDKFMELGAI  | LEPG..NPPKT | DKAAILVDVAI | RMVTQLRGEA  | Q |      |       |   |   |   |
| 134 | 115              | AAG50538      | ESCTGSNSKA | CREKQRRDRL  | NDKFTELVSSV | LEPG..RTPKT | DKVAIINDAI  | RMVNQARDEA  | Q |      |       |   |   |   |
| 135 | 34               | BAA95734      | SCSKPG.TKA | CREKLRREKL  | NDKFMDLVSSV | LEPG..RTPKT | DKSAILDDAI  | RVVNQLRGEA  | H |      |       |   |   |   |
| 136 | 104              | CAB78483      | SCSRGGGTKA | CREKLRREKL  | NERFMDLVSSV | LEPG..RTPKT | DKPAILLDDAI | RILNQLRDEA  | L |      |       |   |   |   |
| 137 | 11               | AAL55718      | KKEAVCSQKA | EREKLRDRL   | KEQFLVGLGNA | LDPN..R.PKS | DKASVLTDTI  | QMLKDVMMNQV | D |      |       |   |   |   |
| 138 | 121              | NM112876      | DVSARKSQKA | GREKLRREKL  | NEHFVLELGNV | LDPE..R.PKN | DKATILTDTV  | QLLKELTSEV  | N |      |       |   |   |   |
| 139 | 47               | NM114632      | GKVPKRINKA | VRELRKREHL  | NELFIELADT  | LELN..Q.QNS | GKASILCEAT  | RFLKDVFGQI  | E |      |       |   |   |   |

Total 89 proteins

### b. AtbHLH proteins predicted to be Non-G-box binding proteins.

Amino acid sequences of the bHLH domains of proteins predicted to retain the capacity to bind an E-box, based on the conservation of the residues E13 and R16, but lacking the amino acids K/H9 important for the recognition of a G-box.

| EN | AtbHLH<br>Number | PID<br>Number | BASIC      |            |             |            | HELIX       |            |   | LOOP | HELIX |   |   |
|----|------------------|---------------|------------|------------|-------------|------------|-------------|------------|---|------|-------|---|---|
|    |                  |               | 1          | 0          | E           | R          | 2           | 0          | 3 | 0    | 4     | 0 | 5 |
| 23 | 10               | AAD20667      | GRGSRKSRST | PTERRRVHF  | NDRFFDLKNL  | IPNP...TKI | DRASIVGEAI  | DYIKELLRTI | E |      |       |   |   |
| 24 | 89               | AAF80214      | GRGSKKRKIF | PTERRRVHF  | KDRFGDLKNL  | IPNP...TKN | DRASIVGEAI  | DYIKELLRTI | D |      |       |   |   |
| 25 | 91               | AAD20666      | GRGKRKNKPF | PTERRRCHL  | NERYALKLL   | IPSP...SKG | DRASILQDGI  | DYINELRRRV | S |      |       |   |   |
| 41 | 35               | BAA97365      | AASSPASKNI | VSERNRQKL  | NQRLFALRSV  | VPNI...TKM | DKASIIKDAI  | SYIEGLQYEE | K |      |       |   |   |
| 42 | 27               | CAB43668      | ATSPASSKNV | VSERNRQKL  | NQRLFALRSV  | VPNI...SKL | DKASVIKDSI  | DYMQELIDQE | K |      |       |   |   |
| 43 | 29               | AAC98450      | KTCTDRSRTL | ISERRRRGRM | KDKLYALRSL  | VPNI...TKM | DKASIVGDAI  | LYVQELQSQA | K |      |       |   |   |
| 44 | 33               | AAF78492      | KKKGMPAKNL | MAERRRRKRL | NDRLYMLRSV  | VPKI...SKM | DRASILGDAI  | DYIKELLQRI | N |      |       |   |   |
| 45 | 116              | NM113586      | KKKGMPAKNL | MAERRRRKRL | NDRLYMLRSV  | VPKI...SKM | DRASILGDAI  | DYIKELLQRI | N |      |       |   |   |
| 46 | 61               | CAB89386      | KLEGQPSKNL | MAERRRRKRL | NDRLSLLRSI  | VPKI...TKM | DRASILGDAI  | DYMKELLDKI | N |      |       |   |   |
| 47 | 93               | NM125962      | KLEGQPSKNL | MAERRRRKRL | NDRLSMLRSI  | VPKI...SKM | DRASILGDAI  | DYMKELLDKI | N |      |       |   |   |
| 48 | 21               | AAC64222      | SGKGSQAKNL | MAERRRRKRL | NDRLYALRSL  | VPRI...TKL | DRASILGDAI  | NYVKELQNEA | K |      |       |   |   |
| 49 | 22               | CAB79132      | EDENFKSPNL | EAERRRREKL | HCRILMALRSH | VPIV...TNM | TKASIVEDAI  | EYIGELQNNV | K |      |       |   |   |
| 50 | 90               | AAD39586      | PTENFKSKNL | HSERKRRERI | NQAMYGLRAV  | VPKI...TKL | NKIGIFSDAV  | DYINELLVEK | Q |      |       |   |   |
| 62 | 103              | CAA20199      | IDYIKFLQEQ | ITEKVRKEKL | GDRITLQQL   | VSPF...GKT | DTASVLHDAI  | DYIKFLQEQI | D |      |       |   |   |
| 69 | 130              | AAB88652      | KRGCATHPRS | LAERVRRTRI | SERMKLLQEL  | VPNM..DKQT | NTSDMLDLAV  | DYIKDLQRQY | K |      |       |   |   |
| 70 | 122              | AAG50543      | KRGCATHPRS | LAERVRRTRI | SERMKLLQEL  | VPNM..DTQT | NTADMLDLAV  | DYIKDLQRQY | K |      |       |   |   |
| 71 | 80               | AAG12608      | KRGCATHPRS | LAERVRRTRI | SDRIRRLQEL  | VPNM..DKQT | NTADMLLEEAV | EYVKALQSQI | Q |      |       |   |   |
| 72 | 81               | CAB78042      | KRGCATHPRS | LAERVRRTRI | SDRIRKLQEL  | VPNM..DKQT | NTADMLLEEAV | EYVKVLQRQI | Q |      |       |   |   |
| 73 | 129              | AAC64303      | KRGFATHPRS | LAERVRRTRI | SGKLLKLQEL  | VPNM..DKQT | SYADMLDLAV  | EHIKGLQHQV | E |      |       |   |   |
| 74 | 128              | AAF29386      | KRGCATHPRS | LAERVRRTRI | SGKLLKLQDL  | VPNM..DKVT | SYSDMLDLAV  | QHIGLQHQV  | Q |      |       |   |   |
