# Supplementary material
Source: PubMed Central journal article supplement (PMC167167)
Supplement: plntcell_15_8_1749__4.pdf [file plntcell_15_8_1749__4.pdf]

**Supplementary Material Table 4. Functionally characterized At-bHLH proteins.**

Information summary on the Arabidopsis bHLH proteins whose biological function has been investigated.

Protein names are abbreviated as follows: PIF3 (Phytochrome Interacting Factor 3); PIF4 (Phytochrome Interacting Factor 4); HFR1 (long Hypocotyl in Far Red 1); ALC (Alcatraz); SPT (Spatula), TT8 (Transparent Testa 8); GL3 (Glabra 3); AMS (Aborted Microspores); BEE 1,2,3 (BR Enhanced Expression 1, 2 and 3); ICE1 (Inducer of CBF Expression 1).

| <b>Name given</b> | <b>Entry number in this paper</b> | <b>AtbHLH number</b> | <b>Process regulated</b>                | <b>Reference</b>                    |
|-------------------|-----------------------------------|----------------------|-----------------------------------------|-------------------------------------|
| <b>PIF3</b>       | 100                               | 8                    | Phytochrome signaling                   | (Ni <i>et al.</i> , 1998)           |
| <b>PIF4</b>       | 102                               | 9                    | Phytochrome signaling                   | (Huq and Quail, 2002)               |
| <b>HFR1</b>       | 68                                | 26                   | Phytochrome signaling                   | (Fairchild <i>et al.</i> , 2000)    |
| <b>ALC</b>        | 98                                | 73                   | Fruit dehiscence                        | (Rajani and Sundaresan, 2001)       |
| <b>SPT</b>        | 99                                | 24                   | Development of carpel margin tissues    | (Heisler, <i>et al.</i> , 2001)     |
| <b>TT8</b>        | 32                                | 42                   | Anthocyanin biosynthesis                | (Nesi <i>et al.</i> , 2000)         |
| <b>GL3</b>        | 31                                | 1                    | Trichome development, root hair spacing | (Payne <i>et al.</i> , 2000)        |
| <b>AMS</b>        | 48                                | 21                   | Microspore development                  | (Sorensen <i>et al.</i> , 2003)     |
| <b>AtMYC2</b>     | 38                                | 6                    | ABA induced gene expression             | (Abe <i>et al.</i> , 2003)          |
| <b>BEE1</b>       | 77                                | 44                   | Brassinosteroid signaling               | (Friedrichsen <i>et al.</i> , 2002) |
| <b>BEE2</b>       | 80                                | 58                   |                                         |                                     |
| <b>BEE3</b>       | 76                                | 50                   |                                         |                                     |
| <b>ICE1</b>       | 45                                | 116                  | Chilling and freezing tolerance         | (Chinnusamy <i>et al.</i> , 2003)   |
