# Supplementary material
Source: PubMed Central journal article supplement (PMC167167)
Supplement: plntcell_15_8_1749__5.pdf [file plntcell_15_8_1749__5.pdf]

**A. Tandem arrays.**

| Chr Number | Entry Number | AtbHLH Number | PID Number |                                                                    |
|------------|--------------|---------------|------------|--------------------------------------------------------------------|
| 3          | 8            | 38            | CAB72167   | PVVVKKLHNHNASERDRRKKINLTLFSSLRSCLEPASDQSKKLSIPETVSKSLKMTPELQQGVK   |
| 3          | 9            | 39            | CAB72168   | PVVVKKLHNHNASERDRRKKINSLFSSLRSCLEPASGQSKKLSIPATVSRSLKMTPELQGVK     |
| 2          | 23           | 10            | AAD20667   | GRGSRKRTSPTEERERFVHFHDFRFFDKNHFNP..TK..IDRASIVGEATDWTKEELRTIE      |
| 2          | 25           | 91            | AAD20666   | GRGKRKNKPFTEERBRCHLNERVEALKLLEPSP..SK..GRASILEQDCIDWINELERRRVS     |
| 2          | 26           | 19            | AAC63587   | RSPVLAKHEVLAERKRRRKLSEKFIASALLPGL..KK..ADKVTITDDAISRMRKQLEELR      |
| 2          | 27           | 20            | AAC63588   | REPHLLKEHVLAERKRRRKLNERHIAISALLPGL..KK..TDKATVLEDAIKHLKQLQERVK     |
| 2          | 28           | 18            | AAC63586   | RSQSNAQDEHILAERKRRRKLTCRFVALSALLPGL..KK..MDKASVLEGDAIKHIRYLCQESVK  |
| 5          | 36           | 5             | BAB08920   | NGREEPLNHVEAERQFRFKLNQRFYSLRSVVFNV..SK..MKASVLEGDAISWINELEKSKLQ    |
| 5          | 40           | 28            | BAA97217   | HGRDKPLNHVEAERMRRRKLNERFYALRAVFNV..SK..MDKASVLEGDAISWINELEKSKAE    |
| 2          | 56           | 106           | AAD11998   | RALAAALRNHKEAERRRRERINSHLNKLRNVLSCN..SK..TKKATLAKVQVRREIKQITL      |
| 2          | 57           | 51            | AAD25935   | KAESLSRSHRLAERKRRDRINSHLITAKRKLVPNS..DK..LKAALATVHEQVRELKQKAA      |
| 2          | 69           | 130           | AAB88652   | KRGCATHPRSTAEERRETRISERMKIQELVFNM..DKQTNISDMLDLAVDITLIDLQRYK       |
| 2          | 73           | 129           | AAC64303   | KRGFATHPRSTAEERRETRISGKLLKIQELVFNM..DKQTSYADMMLDAVEHILGLGHVE       |
| 4          | 104          | 119           | CAA22971   | KRSRAAMHNLSERRRRERINERMKIQELVPC..RNV..DKVSMLEDVIEIVVSLQQLIQ        |
| 4          | 105          | 138           | CAA2297B   | KRSRAAMHNLAERRRRERINERMKIQQLVPC..NRV..DKVSMLEDVIEIVVSLQEMLIQ       |
| 4          | 106          | 56            | CAA22972   | KRSRTAEMHNLAERRRRERINERMKIQQLVPC..NRV..EKVETDDAIEIVVSLQSLIQ        |
| 4          | 107          | 23            | CAB81467   | KRSRAAIMKLSERRRRERINEMMKALQELVPC..TKT..DRSSMLDDVIEIVVSLQSLIQ       |
| 4          | 80           | 58            | CAB80320   | RRGEATDRHSLAERARRRERISKMKIQQLVFGC..NVVITGKAGMLDEIINWVQSLQQVE       |
| 4          | 84           | 63            | CAA18832   | RRQATDSHSLAERVRREKISERMKIQQLVFGC..DKVITGKAGMLDEIINWVQSLQQLVE       |
| 3          | 61           | 113           | BAA99700   | GKRNEKSSVGIKAVRERLGERITAAQQQLVSPYG..KT..DAASVHEBAMGTRIFLQDRIQ      |
| 3          | 63           | 123           | BAB02240   | RAKSEAAASPSPAFK..RKEKMGDRITAAQQQLVSPFG..KT..DAASVHEBATEMTRIFLHQVVS |
| 4          | 3            | 126           | NM118673   | NKKKKLLEHDIERQRRQEMATLFAITRTHLEPLKYIKGKRAVDHVNGLVNFITDITRKI        |
| 4          | 5            | 118           | NM118672   | MEKLVHEKIEKRRRQEMASLYASRSELEPLFIQGKRSTSDQVKGAVNVIDYLRNLIK          |
| 5          | 4            | 120           | NP199992   | TKKEKLLHRNIEERQRRQEMAILFASTRSQLEPLKYIKGKRAMDHVNGLVSPFITDITRNIK     |
| 5          | 6            | 36            | NM124557   | MEKMMHRETERRQRRQEMASLYASRSELEPLHFIKGKRSTSDQVNEAVNVIDYLRNLIK        |

**B. Intrachromosomal duplications.**

| Chr Number | Entry Number | AtbHLH Number | PID Number |                                                               |
|------------|--------------|---------------|------------|---------------------------------------------------------------|
| 1          | 76           | 50            | AAF24852   | RRQATDSHSLAERVRREKINERLKLQQLVFGC..YKIMGMATMLDEIINWVQSLQNOVE   |
| 1          | 77           | 44            | AAF25996   | RRQATDSHSLAERVRREKINERLRLQQLVFGC..YKAMGMATMLDEIINWVQSLQNOVE   |
| 1          | 88           | 31            | BAA87957   | RRQATDSHSLAERARRRERISERMKIQQLVFGC..NVVITGKALVDEIINWVQSLQROVE  |
| 1          | 90           | 74            | AAC34336   | RRQATNSHSLAERVRREKISERMRLQQLVFGC..NVVITGAVLDEIINWVQSLQROVE    |
| 5          | 128          | 142           | BAB09865   | STKEDTGSGLSDQSQKDKIRTAIKLIESVVPGA..RGNBALLLDEAIDVRLKRDLI      |
| 5          | 129          | 143           | CAC05472   | SSQETGSGLSDSQSQKDKHTALRIKIESVVPGA..RGNBALLLDEAIDVRLKQSLN      |
| 4          | 62           | 103           | CAA20199   | IDYIKFPKTLIDKVKRKLGRITAAQQQLVSPFG..KT..DASVHEBATEMTRIFLQEQID  |
| 4          | 65           | 114           | CAB81059   | RPRLETLSPLPSFKVKEKLCRITAAQQQLVSPFG..KT..DASVHEBATEMTRIFLQEQVT |

**C. Interchromosomal duplication.**

| Chr Number | Entry Number | AtbHLH Number | PID Number |                                                                 |
|------------|--------------|---------------|------------|-----------------------------------------------------------------|
| 3          | 8            | 38            | CAB72167   | PVVVKLNENASERDRRKKINTLFSSRSCLFASDQSKLSIPETVSKSLKYIPPELQOVK      |
| 3          | 9            | 39            | CAB72168   | PVVVKLNENASERDRRKKINTLFSSRSCLFASGQSKLSIPATVSRSLKYIPPELQOVK      |
| 2          | 7            | 100           | AAC78547   | PVVVKLNENASERDRRKKINTMFSSRSCLFPTNQTAKLSVSATVSCDLKYIPPELQOVK     |
| 2          | 11           | 67            | CAB71902   | EIENQRINHTIABERNRRRQMNBEHINSRALFLPSYIQR.GDQASIVGGAINVYVVEEQITQ  |
| 4          | 13           | 70            | AAC33499   | EIESQRMTHIABERNRRRQMNVLNSRSILPSSYIQR.GDQASIVGGADDFVKIIEQQLQ     |
| 1          | 24           | 89            | AAF80214   | GRGSKRRIFFPTERRRVVFKDFFGDKNLIENP..TQ.NDRASIVGPAIDYVKEELRRTLD    |
| 2          | 23           | 10            | AAD20667   | GRGSRKRTSPTERRRVHFNDRFFDKNLIENP..TQ.IDRASIVGPAIDYVKEELRRTIE     |
| 2          | 25           | 91            | AAD20666   | GRGKRKNKPFTEERRRCHLNERYEAKLLLESP..SQ.GDRASILDQGLDYVNEVRRRVS     |
| 4          | 29           | 25            | CAB38933   | RNQSNAQDHLIABRRRRRKLTOEFVALSALVLEGL..KK.MDKASVIGDALKHRYVLCERVG  |
| 2          | 26           | 19            | AAC63587   | RSPVLAKEHVLABRRRRRKLSEKFIASALVLEGL..KK.ADKVTLDDATSRMKQLQOLR     |
| 2          | 27           | 20            | AAC63588   | REPHLLKEHVLABRRRRRKLNEFLIALSALVLEGL..KK.TDKATVLEPAKHLKQLQOLR    |
| 2          | 28           | 18            | AAC63586   | RSQSNAQDHLIABRRRRRKLTOEFVALSALVLEGL..KK.MDKASVIGDALKHRYVLCERVK  |
| 4          | 37           | 4             | CAA17131   | NGREPLNHVEARQRREKLNQRFYSLRVAVVNV..SQ.MDKASLIGDASTYVSEVSKSLQ     |
| 5          | 36           | 5             | BAB08920   | NGREPLNHVEARQRREKLNQRFYSLSRVAVVNV..SQ.MDKASLIGDASTYVSEVSKSLQ    |
| 5          | 40           | 28            | BAA97217   | HGRDKPLNHVEARMRREKLNHFYALRAVAVVNV..SQ.MDKTSLLEDAVQVYVNEVSKKAE   |
| 4          | 55           | 107           | CAC00740   | KALASLRNHKEAERRRRARTNSHLNKRKLVLSGN..SQ.TDKSTLDAKVVQRMKELKQOTL   |
| 2          | 56           | 106           | AAD11998   | RALAALRNHKEAERRRRRTNSHLNKRNLVLSGN..SQ.TDKATLAKVVQRMKELKQOTL     |
| 2          | 57           | 51            | AAD25935   | KAESLSRSHLAEKRRRDRINSHLTALRKLVSNS..DK.LDKAALVATVVEQVKEVKKQAA    |
| 2          | 101          | 15            | AAD24380   | KRSRAAEVHNLSERRRRDRINERMKALQELIFRC..NNS.DKASMLDEADYVKSLEQLQ     |
| 4          | 104          | 119           | CAA22971   | KRSRAADMHNLSERRRRDRINERMKALQELIFRC..NRV.DKVSMLDEADYVKSLEQLQ     |
| 4          | 105          | 138           | CAA2297B   | KRSRAAEMHNLABRRRRRKLMBENKTLQQLIFRC..NRV.DKVSMLDEADYVKSLEMLQ     |
| 4          | 106          | 56            | CAA22972   | KRSRTAEMHNLABRRRRRKLNEKMKTLQQLIFRC..NRV.EKVSMLDEADYVKSLEQLQ     |
| 4          | 107          | 23            | CAB81467   | KRSRAAMHMLSEERRRRKINEMMKALQELIFRC..TQT.DRSMLDDEADYVKSLEQLQ      |
| 2          | 102          | 9             | AAD22130   | KRSRAAEVHNLSERRRRDRINERMKALQELIFHC..SQT.DKASLIDDEADYVKSLEQLQ    |
| 3          | 103          | 65            | CAB86934   | KRSRAAEVHNLSERRRRDRINERMKALQELIFHC..SQT.DKASLIDDEADYVKSLEQLQ    |
| 2          | 79           | 64            | AAD15506   | RRGQATDRHSLABRRARREKTSKMKYQLDVLVGC..NNTVTGKAGMLDEIINNVQSLQROVE  |
| 4          | 80           | 58            | CAB80320   | RRGEATDRHSLABRRARREKTSKMKKCLQDVLVGC..NNTVTGKAGMLDEIINNVQSLQOQVE |
| 4          | 84           | 63            | CAA18832   | RRGQATDSHSLAEVVRREKTSERMKFLQDVLVGC..DKITGKAGMLDEIINNVQSLQROIE   |
| 1          | 92           | 7             | AAD25805   | RRGQATDPHSLABRLRRRRLABRIRSLQELVPTV..NNT.DRAAMIDEIVDYVKFIRLOVK   |
| 4          | 93           | 59            | CAB80752   | RRGQATDPHSLABRRRRRRLABRIRALQELVPTV..NNT.DRAAMIDEIVDYVKFIRLOVK   |
| 2          | 94           | 69            | CAA18195   | RRGQATDPHSLABRLRRRRLABRMKSLQELVNG..NNT.DKASMLDEIIVDYVKFIRLOVK   |
| 4          | 95           | 66            | AAD03387   | RRGQATDPHSLABRLRRRRLABRMKALQELVNG..NNT.DKASMLDEIIVDYVKFIRLOVK   |
| 3          | 135          | 34            | BAA95734   | SCSKPG.TKACREKLLREKLNDFVDFSSVLEPGRTPPT.DKPAILLDDAARVNVQIRGEAH   |
| 4          | 136          | 104           | CAB78483   | SCSRGGGTKACREDRRRRKLNERFMDLSSVLEPGRTPPT.DKPAILLDDAARVNVQIRDEAL  |
| 3          | 117          | 37            | CAB62312   | NVRISKDPQSVAAHRRRRRRLSBRIRIQLQVLVGG..TK.MDTASMLDEADYVVKFKKKQVQ  |
| 5          | 118          | 88            | NF201507   | NVRISKDPQSVAAHRRRRRRLSBRIRIQLQVLVGG..TK.MDTASMLDEADYVVKFKKKQVQ  |
| 2          | 110          | 124           | AAC34226   | KKRKSTVEKLYEERKDFEFKMKRALQDLFNC..YK.DKASLIDDEADYVVKFIRLQOVQ     |
| 3          | 111          | 132           | BAC10690   | KKRKNABAYNSPERCNDINKKMRTOQLFNS..HK.DDNESMLDEADYVMTNGLQOVQ       |
| 2          | 97           | 48            | AAD23713   | HSLAERVHNLTDMARREKINARMKLQELVGC..DKIQGTALVLEIINHVOQLQROVE       |
| 3          | 91           | 60            | CAB67608   | RRGQATDSHSLABRRARREKINARMKLQELVGC..DKIQGTALVLEIINHVOQLQROVE     |
